# Supplementary material
Source: publisher site journal article supplement (https://www.dovepress.com/article/307624)
Supplement: Supplementary file 1 [file get_supplementary_file.php]

**
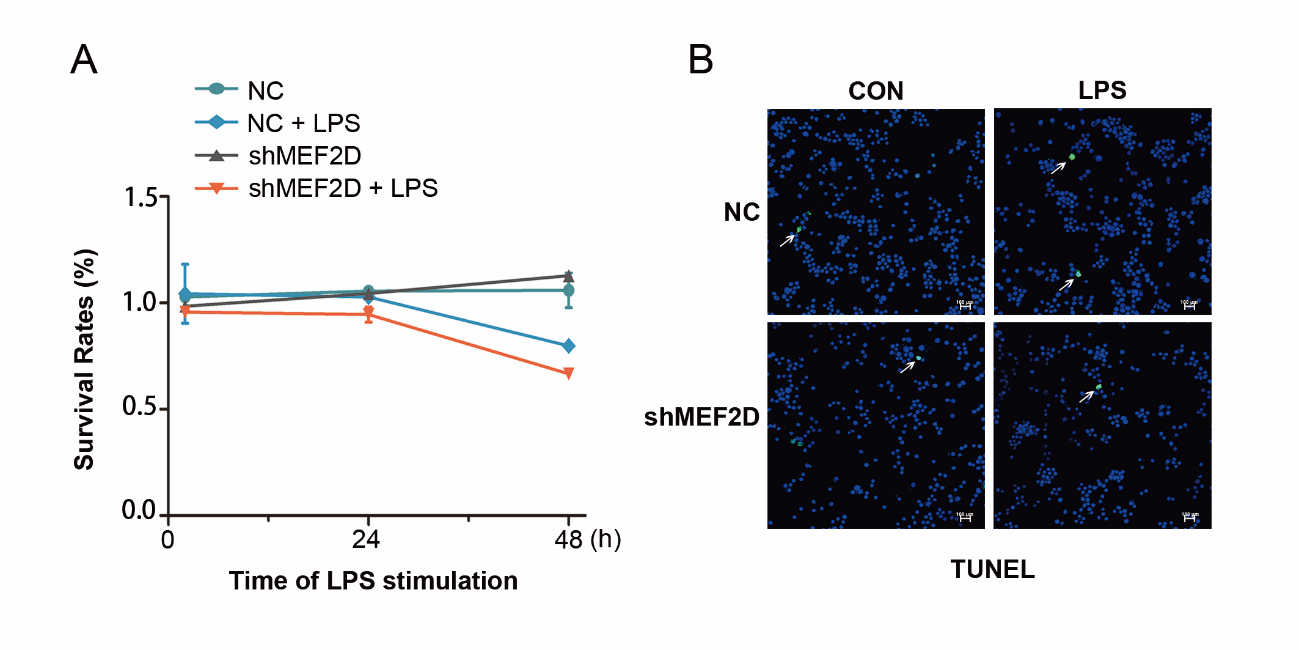
**

**Figure S1. MEF2D knockdown did not affect the survival or proliferation of BV2 cells.** The effect of shMEF2D on cell survival and proliferation was determined. BV2 NC and shMEF2D stable cell lines treated for 24 and 48 h with LPS were assessed by MTT assay (**S1A**) and TUNEL staining (**S1B**. Arrows indicate TUNEL-positive cells.). Scale bars represent 100 μm. Data from three independent experiments are expressed as the mean ± SEM and were analysed by two-way ANOVA (***P* ≤ 0.01).

**Table S1. Primers**

| **Primers for qPCR** | |
| --- | --- |
| NLRP3 | forward, 5′-ATTACCCGCCCGAGAAAGG-3′; reverse, 5′-TCGCAGCAAAGATCCACACAG-3′ |
| Nrf2 | forward, 5′-CAGCATAGAGCAGGACATGGAG-3′; reverse, 5′-GAACAGCGGTAGTATCAGCCAG-3′ |
| iNOS | forward, 5′-TGGACAAGCTGCATGTGACA-3′; reverse, 5′-AGATGAGCTCATCCAGAGTGA-3′ |
| IRF7 | forward, 5′-AGATCAGAAGCAGCTGCACTA-3′; reverse, 5′-AGGTAGATGGTGTAGTGTGGTGA-3′ |
| IFNα1 | forward, 5′-TGAGCTGACCCAGCAGATCCT-3′; reverse, 5′-CATCAGACAGCCTTGCAGGTC-3′ |
| IFIT1 | forward, 5′-GTCCGGTTAAATCCAGAAGATCC-3′; reverse, 5′-GCTTTGTCTACGCGATGTTTCC-3′ |
| MX2 | forward, 5′-ACACGGTCACTGAAATTGTACG-3′; reverse, 5′-TGGAGTCGGATTGACATCTCTG-3′ |
| IFI27 | forward, 5′-TAGCAGCTAAGATGATGTCCTTGT-3′; reverse, 5′-ACTCTCACAGATGTTCATGACACT-3′ |
| ISG15 | forward, 5′- AGCACAGTGATGCTAGTGGT-3′; reverse, 5′-AGCTCAGCCAGAACTGGTCT-3′ |
| DDX58 | forward, 5′-CAGATCCGAGACACTAAAGGGA-3′; reverse, 5′-TCCTCATCAGCCTTGCTTTCA-3′ |
| RSAD2 | forward, 5′-TGAGTGTCAACTACCACTTCACT-3′; reverse, 5′-TCCTTGCAGAATCTCACAAGCTT-3′ |
| ZBP1 | forward, 5′-ATGACGGACAGACGTGGAAGA-3′; reverse, 5′-TGGCAATGGAGATGTGGCTGTT-3′ |
| β-actin | forward, 5′-AAGGACTCCTATAGTGGGTGACGA-3′; reverse, 5′- ATCTTCTCCATGTCGTCCCAGTTG-3′ |
| **Primers for ChIP-qPCR and PCR** | |
| IRF7 promoter | forward, 5′-TGGCTGTCCTGGAATTCACT-3′; reverse, 5′-AGATGGCTCAGCAGGTCAGC-3′ |

**Table S2. KEGG enrichment significant**

| **shMEF2D vs NC** | | | | | | | |
| --- | --- | --- | --- | --- | --- | --- | --- |
| **pathway ID** | **pathway name** | **pathway class** | **annotated** | **significant** | **symbol list** | **classic fisher** | **FDR (false discovery rate)** |
| mmu05146 | Amoebiasis | Infectious diseases | 105 | 5 | Il1r2, Muc2, Serpinb1a, Il6, Arg1 | 0.006 | 0.145 |
| mmu05202 | Transcriptional misregulation in cancers | Cancers | 182 | 7 | Il1r2, Zeb1, Myc, Il6, Bcl2a1b, Eya1, Pax5 | 0.004 | 0.145 |
| mmu04974 | Protein digestion and absorption | Digestive system | 90 | 5 | Slc1a1, Col27a1, Col5a3, Atp1b1, Col12a1 | 0.003 | 0.145 |
| mmu05020 | Prion diseases | Neurodegenerative diseases | 34 | 3 | Il6, C1qa, Egr1 | 0.006 | 0.145 |
| mmu04530 | Tight junction | Cellular community - eukaryotes | 167 | 6 | Synpo, Myh14, Tuba3a, Epb41l4b, Myh3, Cldn7 | 0.011 | 0.217 |
| mmu00010 | Glycolysis / Gluconeogenesis | Carbohydrate metabolism | 68 | 3 | Adh7, Adh1, Acss1 | 0.041 | 0.502 |
| **shMEF2D-LPS vs NC-LPS** | | | | | | | |
| **pathway ID** | **pathway name** | **pathway class** | **annotated** | **significant** | **symbol list** | **classic fisher** | **FDR (false discovery rate)** |
| mmu04621 | NOD-like receptor signaling pathway | Immune system | 167 | 10 | Oas2, Ifi204, Gbp7, Cxcl2, Gbp5, Gbp3, Irf7, Gbp2, Oas3, Il6 | 0.000 | 0.000 |
| mmu05164 | Influenza A | Infectious diseases | 168 | 10 | Oas2, Il12b, Ddx58, Mx2, Cxcl10, Nxf7, Rsad2, Irf7, Oas3, Il6 | 0.000 | 0.000 |
| mmu05202 | Transcriptional misregulation in cancers | Cancers | 182 | 10 | Mef2c, Bcl2a1d, Eya1, Maf, Zeb1, Bcl2a1b, Pax5, Prom1, Pax8, Il6 | 0.000 | 0.000 |
| mmu04622 | RIG-I-like receptor signaling pathway | Immune system | 68 | 6 | Il12b, Ddx58, Cxcl10, Irf7, Rnf125, Isg15 | 0.000 | 0.001 |
| mmu04623 | Cytosolic DNA-sensing pathway | Immune system | 61 | 5 | Ddx58, Cxcl10, Irf7, Zbp1, Il6 | 0.000 | 0.006 |
| mmu05162 | Measles | Infectious diseases | 135 | 7 | Oas2, Il12b, Ddx58, Mx2, Irf7, Oas3, Il6 | 0.000 | 0.006 |
| mmu05168 | Herpes simplex infection | Infectious diseases | 209 | 8 | Oas2, Il12b, Ddx58, Nxf7, Irf7, Oas3, Ifit1, Il6 | 0.001 | 0.014 |
| mmu05321 | Inflammatory bowel disease (IBD) | Immune diseases | 59 | 4 | Il12b, Il10, Maf, Il6 | 0.002 | 0.042 |
| mmu04620 | Toll-like receptor signaling pathway | Immune system | 99 | 4 | Il12b, Cxcl10, Irf7, Il6 | 0.012 | 0.154 |
| mmu04630 | Jak-STAT signaling pathway | Signal transduction | 163 | 5 | Il12b, Il10, Il7r, Aox3, Il6 | 0.016 | 0.158 |
